# Supplementary material for: Effects of Time-Restricted Eating on Nonalcoholic Fatty Liver Disease: The TREATY-FLD Randomized Clinical Trial
Source: PubMed Central journal article supplement (PMC10024204; doi:10.1001/jamanetworkopen.2023.3513), 2023-03-17
Supplement: jamanetwopen-e233513-s002.pdf [file jamanetwopen-e233513-s002.pdf]

## Supplementary Online Content

Wei X, Lin B, Huang Y, et al. Effects of time-restricted eating on nonalcoholic fatty liver disease: the TREATY-FLD randomized clinical trial. *JAMA Netw Open*. 2023;6(3):e233513.  
doi:10.1001/jamanetworkopen.2023.3513

**eTable 1.** Diet Adherence and Physical Activity During Intervention

**eTable 2.** Sensitivity Analyses of the Main Outcomes

**eTable 3.** Adverse Events During Intervention

**eFigure 1.** Effect of Diets on the Intrahepatic Triglyceride (IHTG) Content by Subgroups of Adherence

**eFigure 2.** Effect of Time-Restricted Eating Versus Daily Calorie Restriction on the Weight and Waist Circumference

This supplementary material has been provided by the authors to give readers additional information about their work.

**eTable 1. Diet Adherence and Physical Activity during Intervention.**

| <b>Variables</b>                                           | <b>TRE (n = 45)</b>    | <b>DCR (n = 43)</b>    | <b>P value</b> |
|------------------------------------------------------------|------------------------|------------------------|----------------|
| Diet compliance, mean (SD), % <sup>a</sup>                 |                        |                        |                |
| Month 6                                                    | 87.9 ± 10.3            | 90.5 ± 11.7            | .29            |
| Month 12                                                   | 85.0 ± 10.7            | 85.7 ± 9.4             | .77            |
| Energy deficit, mean (95% CI), kcal/d                      |                        |                        |                |
| Month 6                                                    | 788.5 (717.5 to 859.4) | 718.4 (648.4 to 788.4) | .17            |
| Month 12                                                   | 684.7 (608.1 to 761.3) | 586.9 (516.0 to 657.9) | .07            |
| Carbohydrate intake, mean (SD), %                          |                        |                        |                |
| Month 6                                                    | 51.3 ± 3.6             | 51.7 ± 3.6             | .62            |
| Month 12                                                   | 51.2 ± 3.4             | 51.1 ± 3.3             | .96            |
| Protein intake, mean (SD), %                               |                        |                        |                |
| Month 6                                                    | 19.7 ± 1.3             | 19.2 ± 1.4             | .07            |
| Month 12                                                   | 19.3 ± 1.0             | 19.0 ± 1.3             | .27            |
| Fat intake, mean (SD), %                                   |                        |                        |                |
| Month 6                                                    | 29.3 ± 3.2             | 29.3 ± 3.0             | .97            |
| Month 12                                                   | 29.9 ± 3.1             | 30.2 ± 2.7             | .74            |
| Start of eating window, mean (SD), local time hour: minute |                        |                        |                |
| Month 6                                                    | 8:36 ± 00:55           | 8:27 ± 1:08            | .56            |
| Month 12                                                   | 8:15 ± 00:53           | 8:40 ± 1:11            | .10            |
| End of eating window, mean (SD), local time hour: minute   |                        |                        |                |
| Month 6                                                    | 16:20 ± 0:17           | 19:19 ± 0:29           | <.001          |
| Month 12                                                   | 16:36 ± 0:23           | 19:32 ± 0:26           | <.001          |
| Daily eating window, mean (SD), hour: minute               |                        |                        |                |
| Month 6                                                    | 7:44 ± 0:53            | 10:52 ± 1:12           | <.001          |
| Month 12                                                   | 8:20 ± 0:51            | 10:52 ± 1:11           | <.001          |
| Physical activity, median (IQR), METs/week                 |                        |                        |                |
| Month 6                                                    | 10.0 (3.1 - 17.6)      | 9.9 (6.6 - 16.6)       | .53            |
| Month 12                                                   | 14.8 (9.9 - 26.4)      | 11.0 (6.1 - 19.9)      | .07            |
| SF-12, mean (SD)                                           |                        |                        |                |
| Physical component summary                                 |                        |                        |                |
| Month 6                                                    | 47.4 (8.2)             | 47.9 (7.0)             | .77            |
| Month 12                                                   | 48.0 (8.0)             | 47.8 (6.7)             | .92            |
| Mental component summary                                   |                        |                        |                |
| Month 6                                                    | 53.9 (7.7)             | 54.1 (6.8)             | .93            |
| Month 12                                                   | 52.5 (7.9)             | 52.9 (7.5)             | .81            |
| Total PSQI sleep quality score, mean (SD)                  |                        |                        |                |
| Month 6                                                    | 4.9 (2.3)              | 5.1 (1.8)              | .61            |
| Month 12                                                   | 5.3 (2.4)              | 5.7 (2.9)              | .54            |

Total PHQ-9 score, median (IQR)

|          |           |               |     |
|----------|-----------|---------------|-----|
| Month 6  | 2 (0 - 4) | 3 (1 - 4)     | .84 |
| Month 12 | 2 (0 - 5) | 2.5 (1 - 5.5) | .51 |

---

Abbreviation: TRE, time-restricted eating; DCR, daily calorie restriction; METs, metabolic equivalents; SF-12, the 12-item Short-Form Health Survey Questionnaire; PSQI, the Pittsburgh Sleep Quality Index; PHQ, Patient Health Questionnaire.

<sup>a</sup> Compliance to the diets was defined as the percentage of adherent days during the 6-month and 12-month intervention

**eTable 2. Sensitivity Analyses of the Main Outcomes <sup>a</sup>.**

|                                                   | Changes (95% CIs)      |                        | Difference between groups (95% CIs) | P Value |
|---------------------------------------------------|------------------------|------------------------|-------------------------------------|---------|
|                                                   | TRE (n = 45)           | DCR (n = 43)           |                                     |         |
| <b>Primary outcome</b>                            |                        |                        |                                     |         |
| Intrahepatic triglyceride content, %              |                        |                        |                                     |         |
| Month 6                                           | -8.2 (-10.5 to -6.0)   | -7.8 (-10.0 to -5.6)   | -0.4 (-3.7 to 2.8)                  | .80     |
| Month 12                                          | -6.9 (-9.4 to -4.3)    | -7.5 (-10.0 to -5.1)   | 0.7 (-2.8 to 4.1)                   | .70     |
| Intrahepatic triglyceride content, % <sup>b</sup> |                        |                        |                                     |         |
| Month 6                                           | -7.5 (-9.5 to -5.5)    | -7.4 (-9.3 to -5.4)    | -0.1 (-2.9 to 2.6)                  | .92     |
| Month 12                                          | -7.4 (-9.6 to -5.3)    | -8.2 (-10.3 to -6.0)   | 0.7 (-2.1 to 3.6)                   | .61     |
| <b>Secondary outcome</b>                          |                        |                        |                                     |         |
| Weight, kg                                        |                        |                        |                                     |         |
| Month 6                                           | -9.9 (-11.9 to -7.8)   | -9.5 (-11.6 to -7.4)   | -0.4 (-3.4 to 2.5)                  | .79     |
| Month 12                                          | -7.6 (-10.1 to -5.2)   | -7.6 (-9.8 to -5.4)    | -0.0 (-3.3 to 3.2)                  | >.99    |
| BMI, kg/cm <sup>2</sup>                           |                        |                        |                                     |         |
| Month 6                                           | -3.6 (-4.4 to -2.9)    | -3.4 (-4.1 to -2.6)    | -0.3 (-1.3 to 0.8)                  | .63     |
| Month 12                                          | -2.8 (-3.7 to -2.0)    | -2.7 (-3.5 to -1.9)    | -0.1 (-1.3 to 1.0)                  | .86     |
| Waist circumference, cm                           |                        |                        |                                     |         |
| Month 6                                           | -9.9 (-12.2 to -7.7)   | -8.9 (-11.2 to -6.7)   | -1.0 (-4.2 to 2.2)                  | .55     |
| Month 12                                          | -8.6 (-11.2 to -5.9)   | -8.0 (-10.3 to -5.6)   | -0.6 (-4.1 to 2.9)                  | .73     |
| Fat mass, kg                                      |                        |                        |                                     |         |
| Month 6                                           | -7.2 (-8.8 to -5.6)    | -6.9 (-8.4 to -5.3)    | -0.3 (-2.6 to 1.9)                  | .77     |
| Month 12                                          | -5.8 (-7.7 to -3.8)    | -5.4 (-7.1 to -3.7)    | -0.3 (-2.8 to 2.2)                  | .78     |
| Visceral fat, cm <sup>2</sup>                     |                        |                        |                                     |         |
| Month 6                                           | -39.9 (-51.9 to -27.9) | -37.7 (-49.5 to -26.0) | -2.2 (-19.2 to 14.8)                | .80     |
| Month 12                                          | -32.6 (-46.6 to -18.6) | -34.8 (-46.8 to -22.8) | 2.2 (-16.4 to 20.8)                 | .82     |

Abbreviation: TRE, time-restricted eating; DCR, daily calorie restriction; BMI, body mass index (calculated as the weight in kilograms divided by height in meters squared).

<sup>a</sup> Results are from sensitivity analyses using multiple imputation techniques to impute missing values.

<sup>b</sup> Adjusted for weight loss.

**eTable 3. Adverse Events during Intervention.**

| <b>Adverse events</b>        | <b>TRE (n = 45)</b> | <b>DCR (n = 43)</b> | <b>P value</b> |
|------------------------------|---------------------|---------------------|----------------|
| Discomfort in stomach, n (%) | 2 (4%)              | 2 (5%)              | .98            |
| Constipation, n (%)          | 2 (4%)              | 0                   | .16            |
| Dyspepsia, n (%)             | 5 (11%)             | 4 (9%)              | .75            |
| Hunger, n (%)                | 6 (13%)             | 3 (7%)              | .31            |
| Decreased appetite, n (%)    | 0                   | 2 (5%)              | .15            |
| Dizziness, n (%)             | 5 (11%)             | 4 (9%)              | .75            |
| Fatigue, n (%)               | 2 (4%)              | 2 (5%)              | .98            |
| Total cases, n (%)           | 13 (29%)            | 12 (28%)            | .87            |

Abbreviation: TRE, time-restricted eating; DCR, daily calorie restriction.

Advent events from randomization among all participants are included in the table and are presented with the numbers of participants that reported adverse events. In addition, the total is the number of participants with any adverse events.

**eFigure 1. Effect of diets on the Intrahepatic Triglyceride (IHTG) Content by Subgroups of Adherence.**

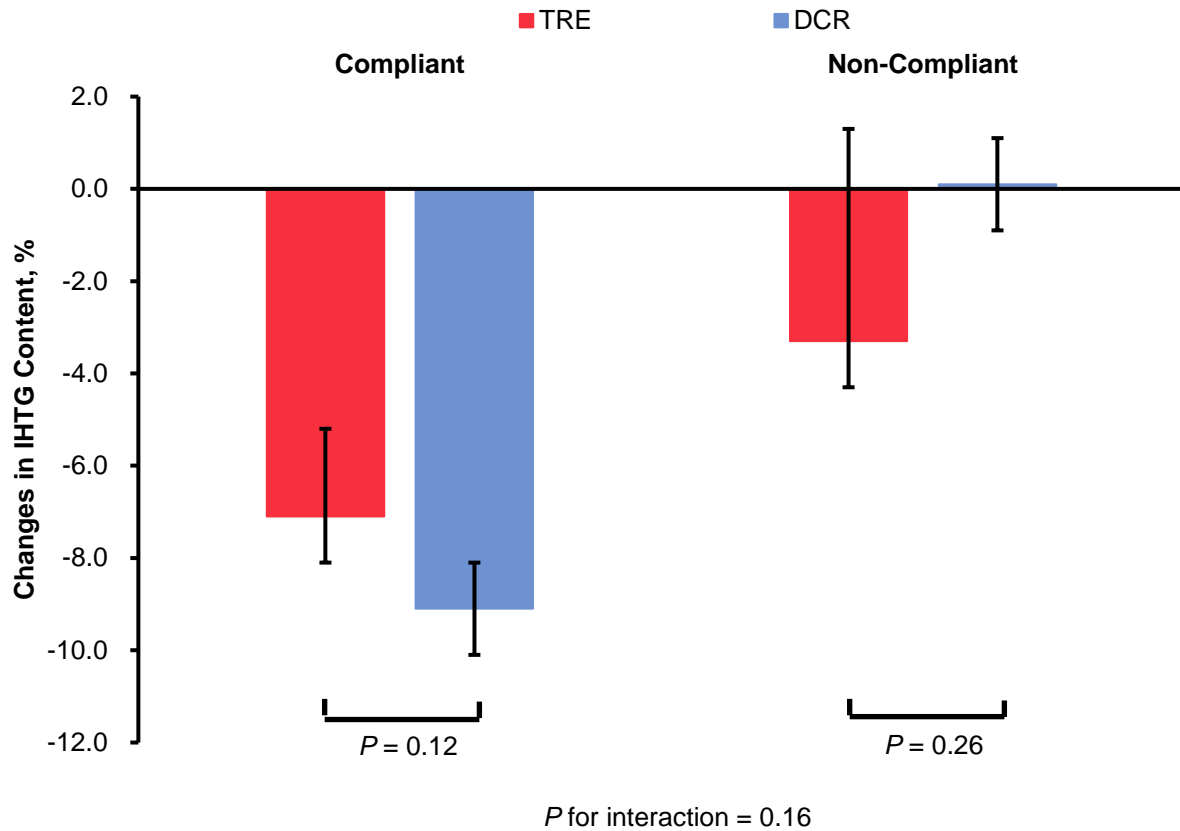

Compliant is defined as adhering to the diet program more than 75% of the days. Non-Compliant is defined as adhering to the diet program less than 75% of the days.

Data are presented as estimated absolute IHTG content at measurements times, by treatment group, from linear mixed models. Error bars represent 95% CIs.

Abbreviation: TRE, time-restricted eating; DCR, daily calorie restriction.

**eFigure 2. Effect of Time-Restricted Eating versus Daily Calorie Restriction on the Weight and Waist Circumference.**

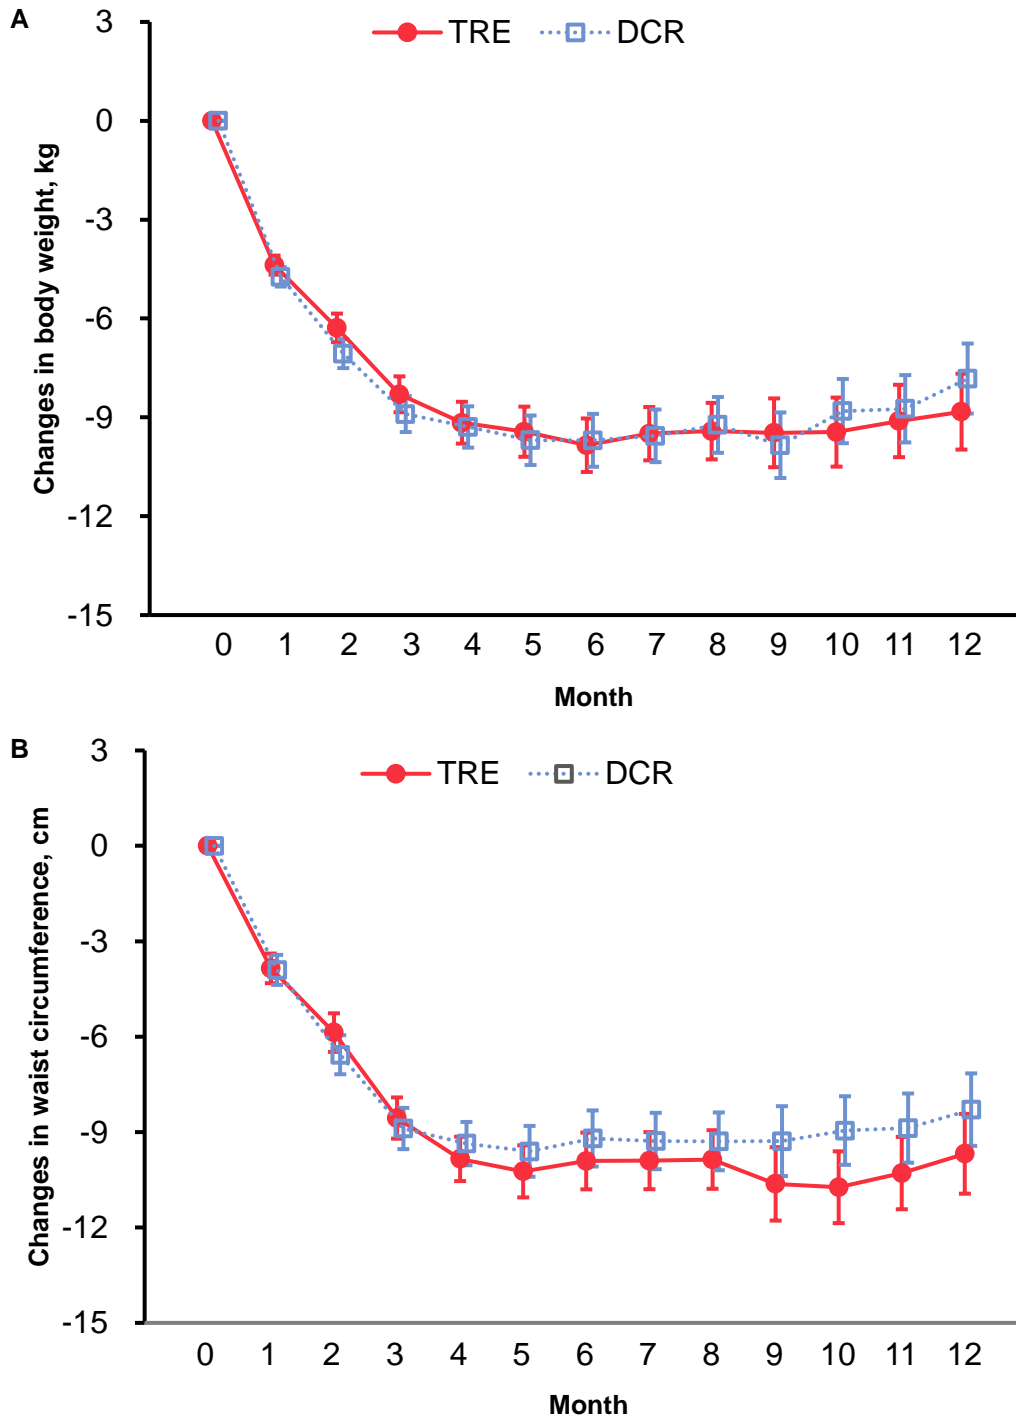

Data are presented as observed values at measurements times, by treatment group. Error bars represent 95% CIs.

Panel A. Change in body weight over time for TRE group (red line) and DCR group (blue line).

Panel B. Change in waist circumference over time for TRE group (red line) and DCR group (blue line).

Abbreviation: TRE, time-restricted eating; DCR, daily calorie restriction.
