# Supplementary material for: Effects of Time-Restricted Eating on Nonalcoholic Fatty Liver Disease: The TREATY-FLD Randomized Clinical Trial
Source: PubMed Central journal article supplement (PMC10024204; doi:10.1001/jamanetworkopen.2023.3513), 2023-03-17
Supplement: jamanetwopen-e233513-s003.pdf [file jamanetwopen-e233513-s003.pdf]

## Data Sharing Statement

Wei. Effects of Time-Restricted Eating on Nonalcoholic Fatty Liver Disease. *JAMA Netw Open*.  
Published March 17, 2023. doi:10.1001/jamanetworkopen.2023.3513

### Data

**Data available:** No
